# Supplementary material for: Isocitrate dehydrogenase mutation in Vibrio anguillarum results in virulence attenuation and immunoprotection in rainbow trout (Oncorhynchus mykiss)
Source: PubMed Central journal article supplement (PMC5686843; doi:10.1186/s12866-017-1124-1), 2017-11-14

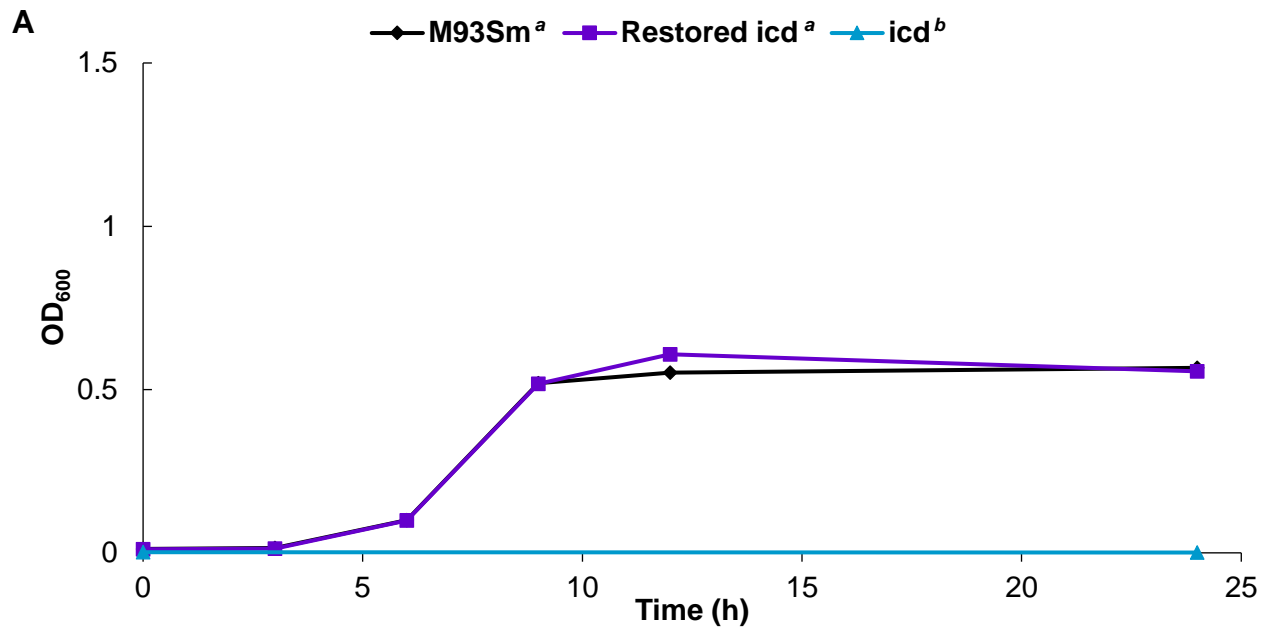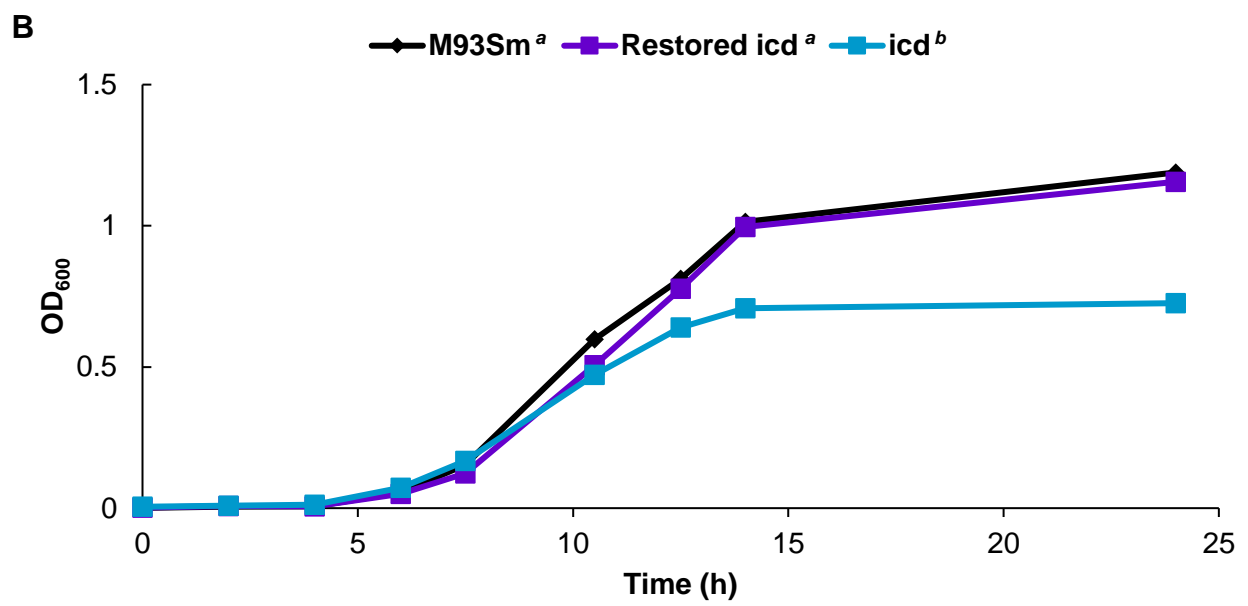

Supplement: 12866_2017_1124_MOESM1_ESM.pdf [file 12866_2017_1124_MOESM1_ESM.pdf]
